# Supplementary material for: Microfluidic device using chemiluminescence and a DNA-arrayed thin film transistor photosensor for single nucleotide polymorphism genotyping of PCR amplicons from whole blood
Source: Royal Society of Chemistry journal article supplement (doi:10.1039/b817427j), 2009-01-01
Supplement: b817427j.pdf [file b817427j.pdf]

# Microfluidic Device using Chemiluminescence and DNA-arrayed Thin Film Transistor Photosensor for Single Nucleotide Polymorphism Genotyping of PCR Amplicons from Whole Blood

## Electronic Supplementary Information

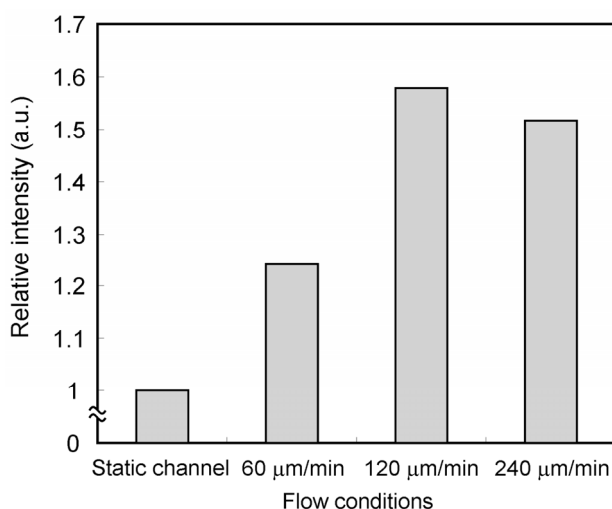

**Fig. S1** Relationship between hybridization reaction and flow rate in the microchannel. Relative intensities were derived against the luminescence intensity of the static channel which was set as 1.0.

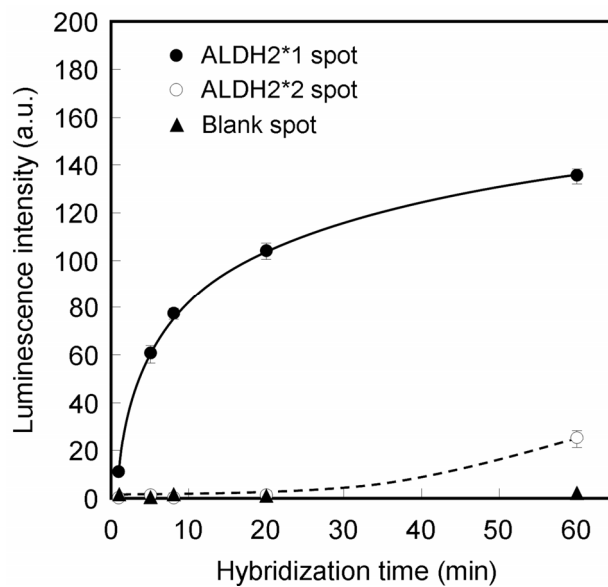

**Fig. S2** Signal increment of ALDH2\*1/\*1 target (63-mer, 100 nM) hybridized to the ALDH2\*1 and ALDH2\*2 spots on the TFT photosensor. Exposure time was set at 4.8 sec.

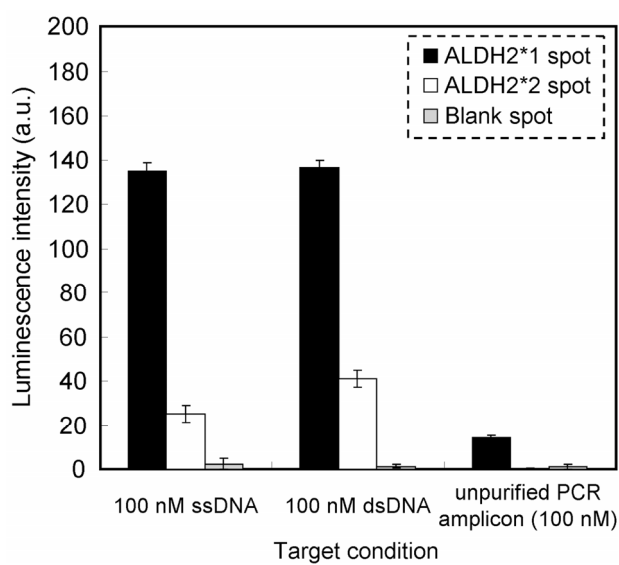

**Fig. S3** Comparison of hybridization efficiency based on various target conditions. ALDH2\*1\*1 was used as a target in all conditions.

Table S1. Total time required for SNP detection

| Operation steps       | Operating time (min) |
|-----------------------|----------------------|
| Direct PCR            | 25.0                 |
| Denaturing of dsDNA   | 10.0                 |
| Shuttle hybridization | 5.0                  |
| Washing               | 1.3                  |
| HRP labeling          | 10.0                 |
| Washing               | 0.8                  |
| Addition of substrate | 0.5                  |
| Observation           | 0.1                  |
| Total                 | 52.7                 |
